# Supplementary material for: A Network of Conserved Damage Survival Pathways Revealed by a Genomic RNAi Screen
Source: PubMed Central journal article supplement (PMC2688755; doi:10.1371/journal.pgen.1000527), 2009-06-19
Supplement: pgen.1000527.s015.pdf [file pgen.1000527.s015.pdf]

**MMS Survival Pathways**

|               | Genes in Pathway | Essential Genes in Pathway | Screen Hits |                |       |                        |                  |                              | Not Screen Hits |       |                       |          | P= (Total Validated) | P= (Adjusted for Essential Genes) | Total (Validated + Trend) | P= (Total Validated + Trend) | P= (Adjusted for Essential Genes) | Percent of testable Pathway Genes that Validated |
|---------------|------------------|----------------------------|-------------|----------------|-------|------------------------|------------------|------------------------------|-----------------|-------|-----------------------|----------|----------------------|-----------------------------------|---------------------------|------------------------------|-----------------------------------|--------------------------------------------------|
|               |                  |                            | Validated   | P= (Validated) | Trend | P= (Validated + Trend) | Did not validate | Adjusted for Essential Genes | Validated       | Trend | Total Genes Validated |          |                      |                                   |                           |                              |                                   |                                                  |
| BER           | 20               | 0                          | 2           | 3.40E-02       | 4     | 3.48E-07               | 0                | NA                           | 6               | 1     | 8                     | 2.64E-10 | NA                   | 13                                | 2.83E-17                  | NA                           | 65%                               |                                                  |
| DDR           | 22               | 1                          | 1           | NS             | 0     | NA                     | 0                | NS                           | 6               | 4     | 7                     | 2.27E-08 | 1.57E-08             | 11                                | 4.44E-13                  | 2.27E-13                     | 52%                               |                                                  |
| Proteasome    | 51               | 15                         | 5           | 9.50E-04       | 0     | NA                     | 0                | 1.80E-04                     | 15              | 2     | 20                    | 2.54E-23 | 3.20E-27             | 22                                | 7.36E-23                  | 2.53E-27                     | 61%                               |                                                  |
| GSH           | 60               | 0                          | 3           | NS             | 0     | NA                     | 0                | NA                           | 18              | 4     | 21                    | 3.71E-23 | NA                   | 25                                | 2.88E-25                  | NA                           | 42%                               |                                                  |
| TOR           | 52               | 0                          | 6           | 1.20E-04       | 1     | 1.20E-05               | 2                | 1.10E-04                     | 16              | 6     | 22                    | 2.33E-26 | 1.37E-26             | 31                                | 2.94E-37                  | 1.21E-37                     | 61%                               |                                                  |
| NER           | 39               | 0                          | 9           | 5.27E-09       | 1     | 2.44E-10               | 1                | NA                           | 11              | 3     | 20                    | 2.72E-26 | NA                   | 25                                | 1.36E-31                  | NA                           | 64%                               |                                                  |
| MMR           | 18               | 0                          | 0           | NA             | 1     | NS                     | 0                | NA                           | 4               | 2     | 4                     | 1.24E-04 | NA                   | 7                                 | 7.42E-08                  | NA                           | 39%                               |                                                  |
| HRR           | 11               | 0                          | 2           | 1.10E-02       | 0     | NA                     | 0                | NA                           | 2               | 2     | 4                     | 1.45E-05 | NA                   | 6                                 | 5.36E-08                  | NA                           | 55%                               |                                                  |
| RECQ          | 4                | 0                          | 1           | NS             | 0     | NA                     | 0                | NA                           | 0               | 0     | 1                     | NA       | NA                   | 1                                 | NA                        | NA                           | 25%                               |                                                  |
| Transcription | 32               | 3                          | 6           | 6.96E-06       | 1     | 3.92E-07               | 5                | 3.79E-06                     | 6               | 7     | 12                    | 2.32E-14 | 5.58E-15             | 25                                | 3.58E-35                  | 2.71E-37                     | 86%                               |                                                  |
| Ribosome      | 64               | 9                          | 3           | NS             | 0     | NA                     | 3                | 4.80E-02                     | 7               | 20    | 10                    | 4.10E-09 | 8.97E-09             | 32                                | 5.25E-35                  | 6.64E-38                     | 58%                               |                                                  |
| ATPase        | 46               | 5                          | 4           | 4.70E-03       | 1     | 5.88E-04               | 2                | 3.10E-03                     | 14              | 4     | 18                    | 3.81E-21 | 2.94E-22             | 25                                | 5.33E-29                  | 8.90E-31                     | 61%                               |                                                  |
| Notch         | 20               | 2                          | 3           | 3.00E-03       | 0     | NA                     | 0                | 2.20E-03                     | 5               | 4     | 8                     | 2.64E-10 | 9.43E-11             | 12                                | 1.95E-15                  | 2.99E-16                     | 67%                               |                                                  |
